# Supplementary material
Source: publisher figshare collection journal article supplement (https://springernature.figshare.com/ndownloader/files/17476754)
Supplement: Supplementary file [file 17476754]

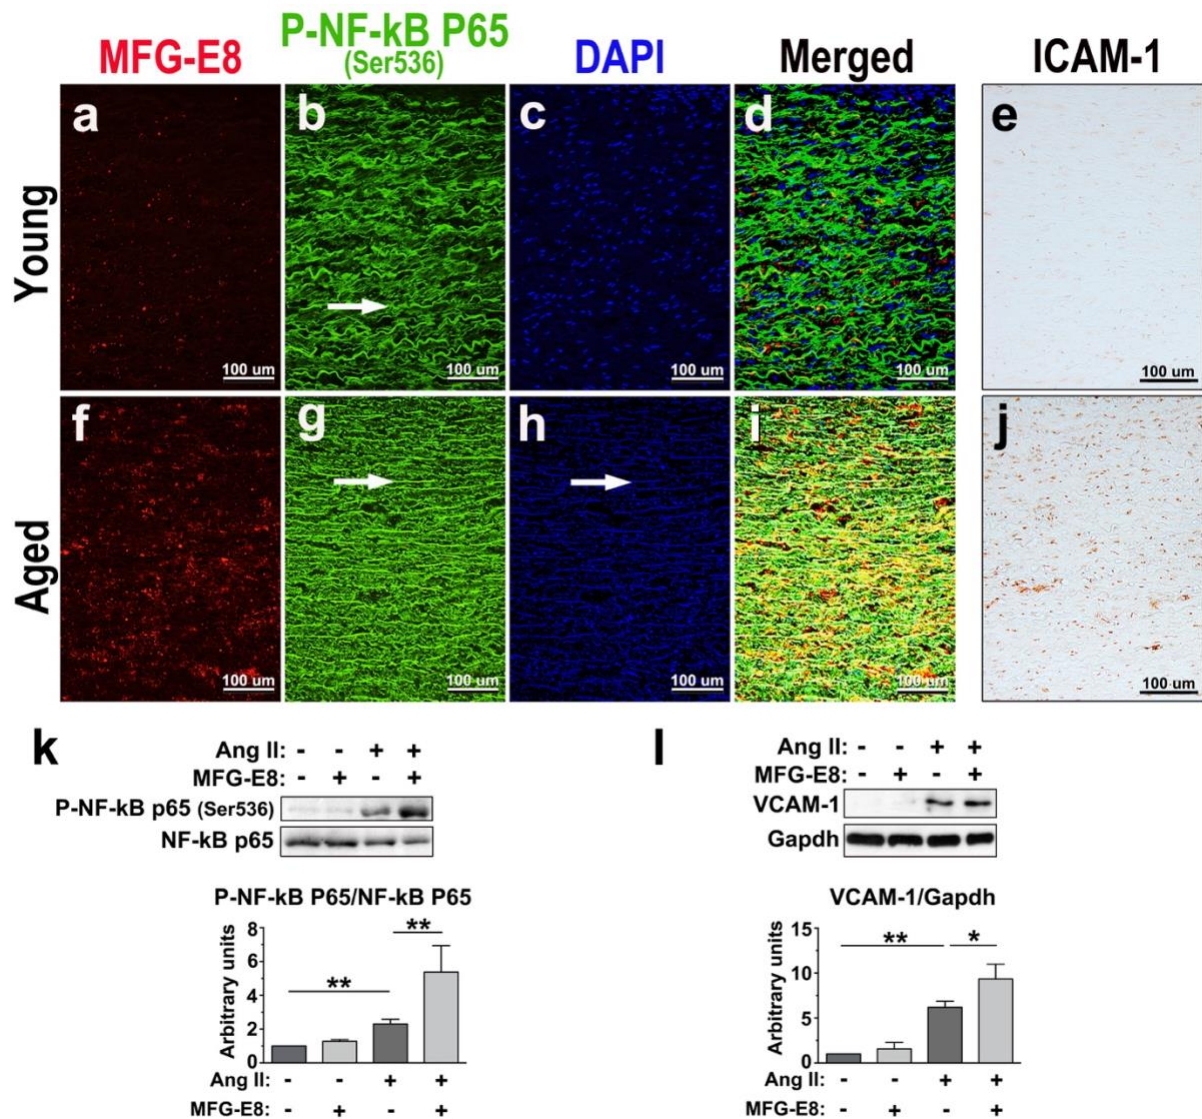

**Figure S1. MFG-E8 abundantly expresses in aged human aortas and augments**

**transactivation of NF-κB p65 in human VSMCs.** (a–j) Representative IHC images display

increased coexpression of MFG-E8 and phosphorylated NF-κB p65 (Ser536) as well as

elevated ICAM-1 intensity in aged aortas. Arrows indicate the autofluorescence of the

elastic laminae in the vessels; bar, 100 μm. (k–l) After treatment with rMFG-E8 (250 ng/mL)

for 24 h, hAoSMCs were stimulated with Ang II (1 μM) for 24 h to mimic aging. (k) Cell

lysates were analyzed through immunoblotting with antibodies specific for NF-κB p65

phosphorylated at Ser536 and NF-κB p65. Levels of phosphorylated p65, normalized to that

of total p65 ( $n = 3$ ), were analyzed. (l) The protein expression of VCAM-1 in hAoSMCs was

evaluated through immunoblotting; the quantitative analysis results for VCAM-1, normalized to that of Gapdh, are displayed ( $n = 3$ ). Data are presented as mean  $\pm$  standard deviation.  $*P < 0.05$  and  $**P < 0.01$ , one-way analysis of variance followed by Tukey's multiple comparison test.
